# Supplementary figures and images for: What Has Changed in the Management of Uterine Serous Carcinomas? Two Decades of Experience
Source: MDPI journal article supplement (doi:10.3390/curroncol28060410), 2021-11-20

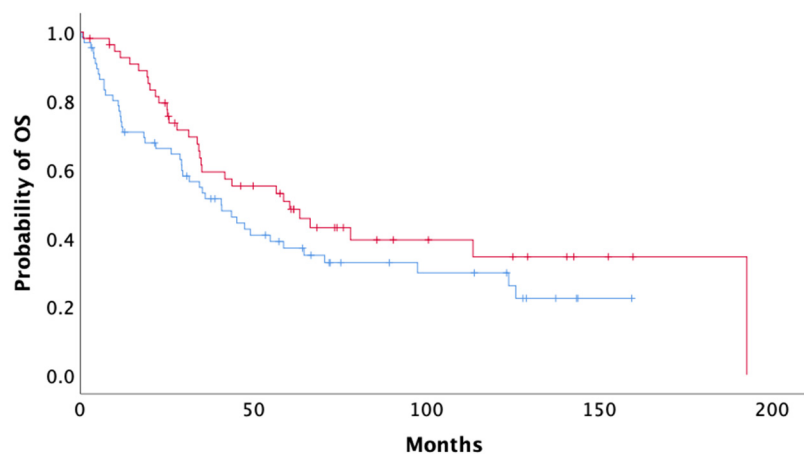

**Figure S1.** Overall survival difference between mixed and pure USCs.

Supplement: s1 [file s1]
